# Supplementary material for: Training secondary school students as anti-smoke ambassadors using the service-learning model: A cluster randomized controlled trial with hybrid type 1 effectiveness-implementation design study protocol
Source: PubMed Central journal article supplement (PMC11563479; doi:10.1371/journal.pone.0313404), 2024-11-14
Supplement: pone.0313404.s003.pdf [file pone.0313404.s003.pdf]

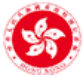

Detail of Approved Project (Reference No.: 06210048)

|                               |                                                                                                                                                                                                                                                                                                                                                                                                                                                                                                                                                                                                                                                                                                                                                                                                                                                                                                                                                                                                                                                                                                                                                                                                                                                                                                                                                                                                                                                                                                                                                                                                                                                                                                                                                                                                                |
|-------------------------------|----------------------------------------------------------------------------------------------------------------------------------------------------------------------------------------------------------------------------------------------------------------------------------------------------------------------------------------------------------------------------------------------------------------------------------------------------------------------------------------------------------------------------------------------------------------------------------------------------------------------------------------------------------------------------------------------------------------------------------------------------------------------------------------------------------------------------------------------------------------------------------------------------------------------------------------------------------------------------------------------------------------------------------------------------------------------------------------------------------------------------------------------------------------------------------------------------------------------------------------------------------------------------------------------------------------------------------------------------------------------------------------------------------------------------------------------------------------------------------------------------------------------------------------------------------------------------------------------------------------------------------------------------------------------------------------------------------------------------------------------------------------------------------------------------------------|
| <b>Fund</b>                   | : HMRF - Health Promotion                                                                                                                                                                                                                                                                                                                                                                                                                                                                                                                                                                                                                                                                                                                                                                                                                                                                                                                                                                                                                                                                                                                                                                                                                                                                                                                                                                                                                                                                                                                                                                                                                                                                                                                                                                                      |
| <b>Project Status</b>         | : Current                                                                                                                                                                                                                                                                                                                                                                                                                                                                                                                                                                                                                                                                                                                                                                                                                                                                                                                                                                                                                                                                                                                                                                                                                                                                                                                                                                                                                                                                                                                                                                                                                                                                                                                                                                                                      |
| <b>Reference No.</b>          | : 06210048                                                                                                                                                                                                                                                                                                                                                                                                                                                                                                                                                                                                                                                                                                                                                                                                                                                                                                                                                                                                                                                                                                                                                                                                                                                                                                                                                                                                                                                                                                                                                                                                                                                                                                                                                                                                     |
| <b>Project Title</b>          | : Learning while serving: Training secondary school students as anti-smoke ambassadors using the service-learning model                                                                                                                                                                                                                                                                                                                                                                                                                                                                                                                                                                                                                                                                                                                                                                                                                                                                                                                                                                                                                                                                                                                                                                                                                                                                                                                                                                                                                                                                                                                                                                                                                                                                                        |
| <b>Research Activity Code</b> | : Prevention of disease and conditions, and promotion of well-being                                                                                                                                                                                                                                                                                                                                                                                                                                                                                                                                                                                                                                                                                                                                                                                                                                                                                                                                                                                                                                                                                                                                                                                                                                                                                                                                                                                                                                                                                                                                                                                                                                                                                                                                            |
| <b>Health Category</b>        | : Generic health relevance                                                                                                                                                                                                                                                                                                                                                                                                                                                                                                                                                                                                                                                                                                                                                                                                                                                                                                                                                                                                                                                                                                                                                                                                                                                                                                                                                                                                                                                                                                                                                                                                                                                                                                                                                                                     |
| <b>Applicant(s)</b>           | : LAM Katherine Ka-wai <sup>(1)</sup><br>HO Ka Yan <sup>(2)</sup><br>MAK Yim Wah <sup>(2)</sup><br>LEUNG Doris Yin Ping <sup>(2)</sup><br>WONG Arkers Kwan Ching <sup>(1)</sup><br>WU Cynthia <sup>(1)</sup>                                                                                                                                                                                                                                                                                                                                                                                                                                                                                                                                                                                                                                                                                                                                                                                                                                                                                                                                                                                                                                                                                                                                                                                                                                                                                                                                                                                                                                                                                                                                                                                                   |
| <b>Affiliation(s)</b>         | : School of Nursing, The Hong Kong Polytechnic University <sup>(1)</sup><br>School of Nursing , The Hong Kong Polytechnic University <sup>(2)</sup>                                                                                                                                                                                                                                                                                                                                                                                                                                                                                                                                                                                                                                                                                                                                                                                                                                                                                                                                                                                                                                                                                                                                                                                                                                                                                                                                                                                                                                                                                                                                                                                                                                                            |
| <b>Approved Amount (HK\$)</b> | : \$727,400.00                                                                                                                                                                                                                                                                                                                                                                                                                                                                                                                                                                                                                                                                                                                                                                                                                                                                                                                                                                                                                                                                                                                                                                                                                                                                                                                                                                                                                                                                                                                                                                                                                                                                                                                                                                                                 |
| <b>Abstract</b>               | : Objective: This project aims to promote smoking cessation by training secondary school students as anti-smoke ambassadors (ASAs) with increased knowledge, skills and self-efficacy on smoking cessation and AWARD (Ask, Warn, Advise, Refer, Do-it-again) model using service-learning model. Hypothesis: ASAs will report statistically significant higher level of knowledge, self-efficacy, and improved practice and attitude in smoking cessation and AWARD model at follow-up when compared to baseline. Design and subjects: This is a health promotion project to recruit secondary school students (Forms 2 to F4) in Hong Kong as ASAs. Interventions: Recruited students will attend a 3-hour training workshop, followed by hands-on sessions supervised by trained nursing students in Youth Quitline, then a 6-month smoker referral competition and an award presentation ceremony. Instruments: Questionnaires which were previously used in our team's projects on smoking cessation and semi-structured interviews will be used. Main outcome measures: The number of ASAs trained and smokers being delivered the brief interventions, ASAs' level of knowledge, practice, attitude and self-efficacy in smoking cessation and AWARD model immediately after the training programs and 3, 6, and 12 months after the programs. Data analysis: Descriptive statistics, one-way repeated measures ANOVA, logistic regressions, and content analysis will be used. Expected outcomes: At least 360 secondary school students will attend the training programs and be trained as ASAs. The project will enhance the community capacity in smoking cessation by training a considerable number of ASAs who will deliver brief interventions to numerous smokers when they encounter smokers. |
| <b>Keywords</b>               | :                                                                                                                                                                                                                                                                                                                                                                                                                                                                                                                                                                                                                                                                                                                                                                                                                                                                                                                                                                                                                                                                                                                                                                                                                                                                                                                                                                                                                                                                                                                                                                                                                                                                                                                                                                                                              |
| <b>Instruments</b>            | :                                                                                                                                                                                                                                                                                                                                                                                                                                                                                                                                                                                                                                                                                                                                                                                                                                                                                                                                                                                                                                                                                                                                                                                                                                                                                                                                                                                                                                                                                                                                                                                                                                                                                                                                                                                                              |
| <b>Remarks</b>                | :                                                                                                                                                                                                                                                                                                                                                                                                                                                                                                                                                                                                                                                                                                                                                                                                                                                                                                                                                                                                                                                                                                                                                                                                                                                                                                                                                                                                                                                                                                                                                                                                                                                                                                                                                                                                              |
| <b>Dissemination Report</b>   | :                                                                                                                                                                                                                                                                                                                                                                                                                                                                                                                                                                                                                                                                                                                                                                                                                                                                                                                                                                                                                                                                                                                                                                                                                                                                                                                                                                                                                                                                                                                                                                                                                                                                                                                                                                                                              |
| <b>Final Report</b>           | :                                                                                                                                                                                                                                                                                                                                                                                                                                                                                                                                                                                                                                                                                                                                                                                                                                                                                                                                                                                                                                                                                                                                                                                                                                                                                                                                                                                                                                                                                                                                                                                                                                                                                                                                                                                                              |

[Add to Bookmark](#) [Back](#)

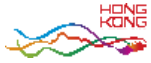

2013© | [Important Notices](#) | [Privacy Policy](#)
